# Supplementary material
Source: Springer Nature journal article supplement (https://www.springermedizin.de/resource/supplementary/13643_2014_313_MOESM6_ESM.pdf/9681726)
Supplement: MOESM6 [file 9681726]

P Patients with bowel anastomosis  
I Stapling with bloodclotting adjuvant  
C Standard stapling  
O Mortality, morbidity, anastomotic leak

P Patients with bowel anastomosis  
I Stapling with 4 or more rows  
C Standard stapling  
O Mortality, morbidity, anastomotic leak

P Patients with bowel anastomosis  
I Stapler anastomosis  
C Hand-sewn anastomosis  
O Mortality, morbidity, anastomotic leak

P Patients with distal pancreas resection  
I Stapler closure  
C Hand-sewn closure  
O Mortality, morbidity, anastomotic leak

P Patients undergoing haemorrhoidectomy  
I Stapler operation (Longo)  
C Conventional technique  
O Mortality, morbidity, re-operation, operation time

((("stapler"[tiab] OR "Surgical Staplers"[Mesh] OR "surgical stapler" [tiab] OR "surgical staplers" [tiab] OR "Surgical Stapling" [MAJR] OR "surgical stapling"[tiab] OR (stapl\* AND (row OR rows) OR "stapler anastomosis" OR "stapler anastomoses" OR "stapler closure" Or "milligan-morgan" )) AND (surgery[tiab] OR surgeries[tiab] OR surgic\*[tiab])) AND ((randomized controlled trial[pt] OR controlled clinical trial[pt] OR randomized[tiab] OR placebo[tiab] OR clinical trials as topic[mesh:noexp] OR double blind method[mh] OR randomly[tiab] OR trial[ti] NOT (animals[mh] NOT humans[mh])))
